# Supplementary figures and images for: The Ebola Virus Interferon Antagonist VP24 Undergoes Active Nucleocytoplasmic Trafficking
Source: MDPI journal article supplement (doi:10.3390/v13081650), 2021-08-19

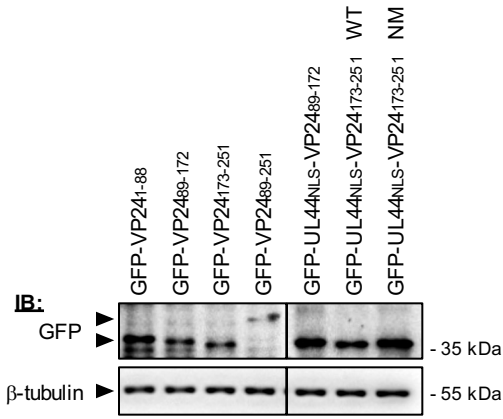

Supplement: s1 [file s1]

(a)

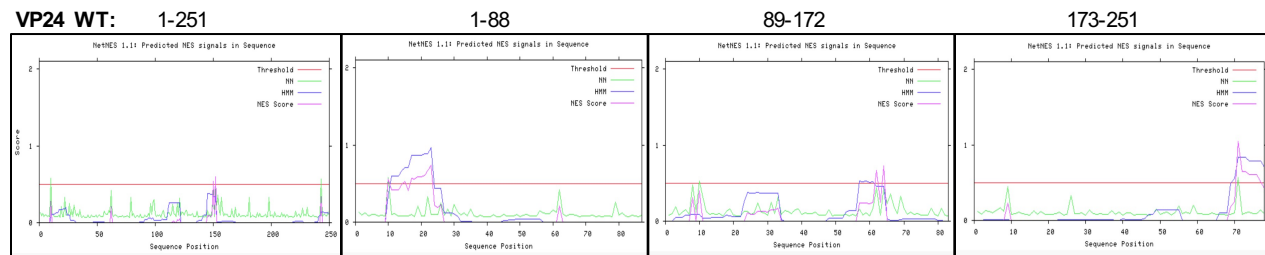

(b)

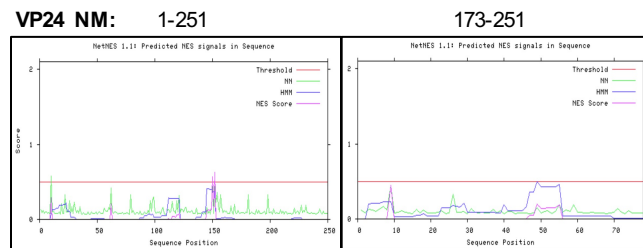

(c)

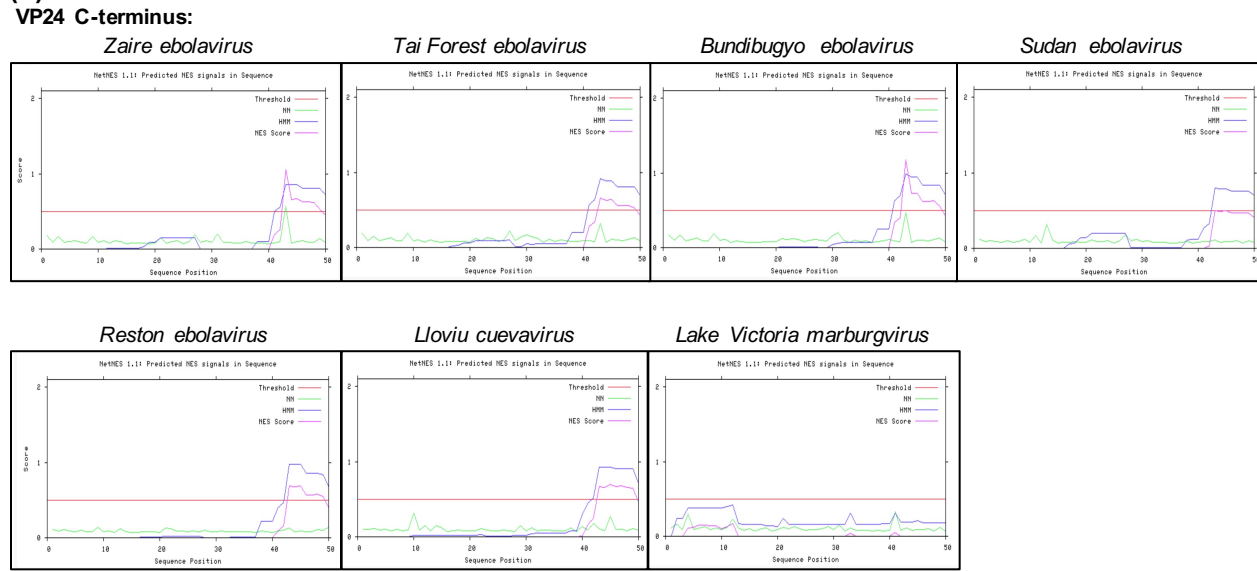

Supplement: s1 [file s1]

**IB:**

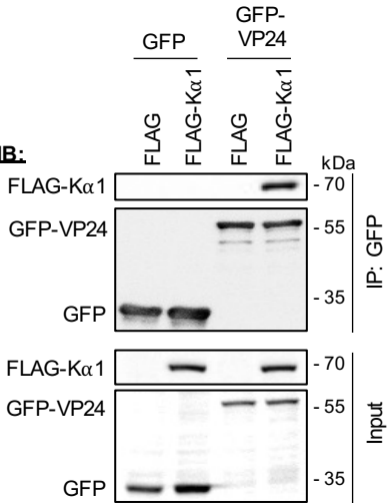

Supplement: s1 [file s1]

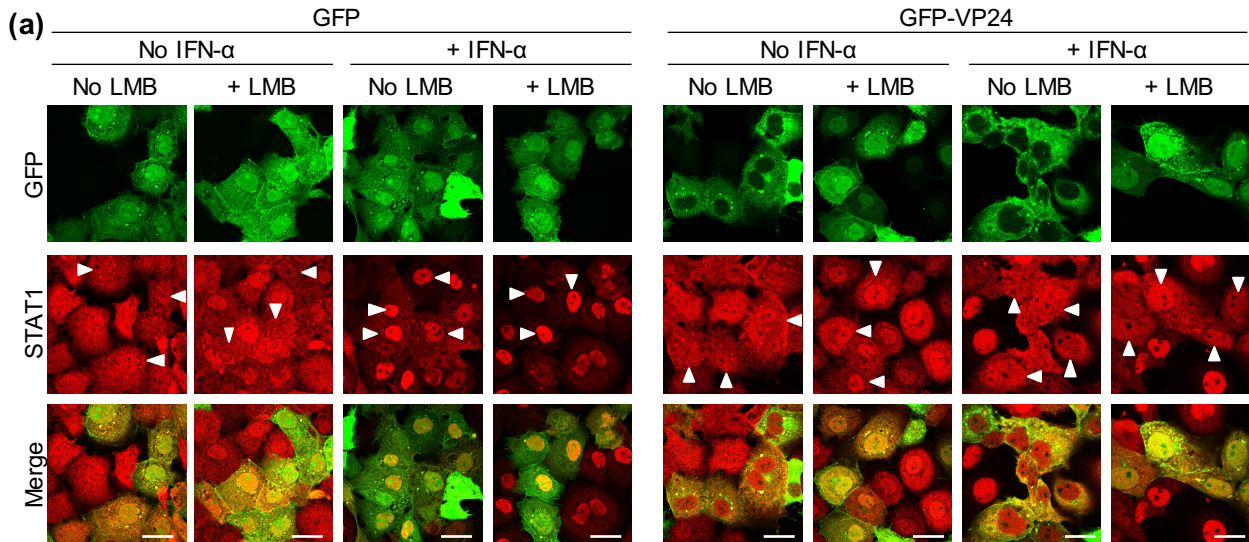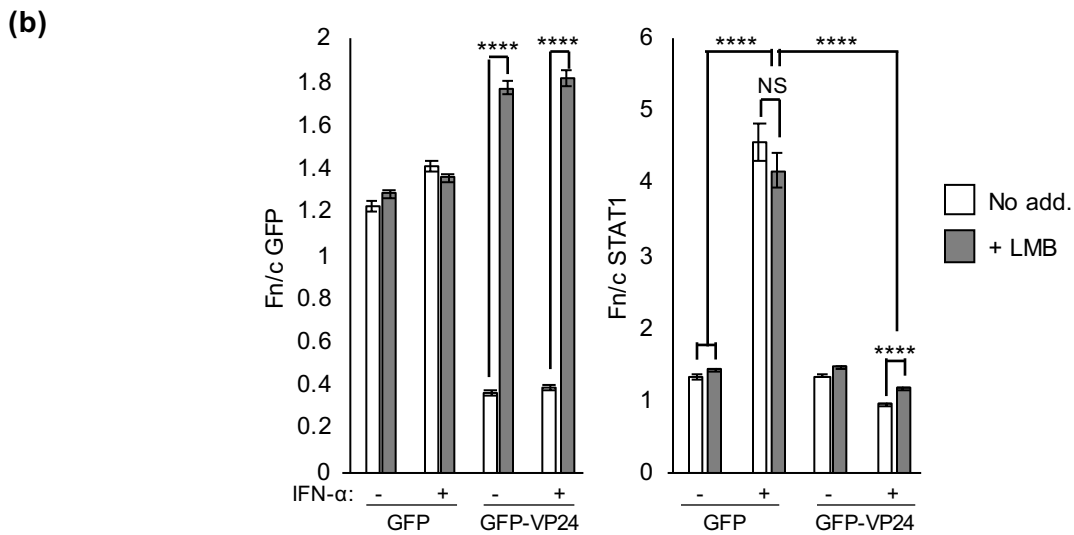

Supplement: s1 [file s1]

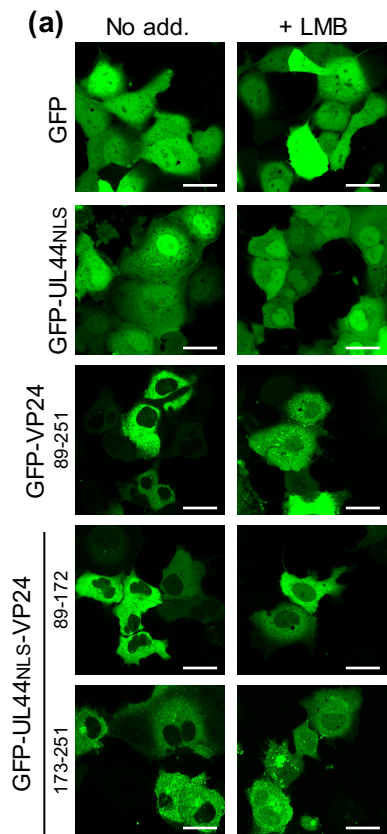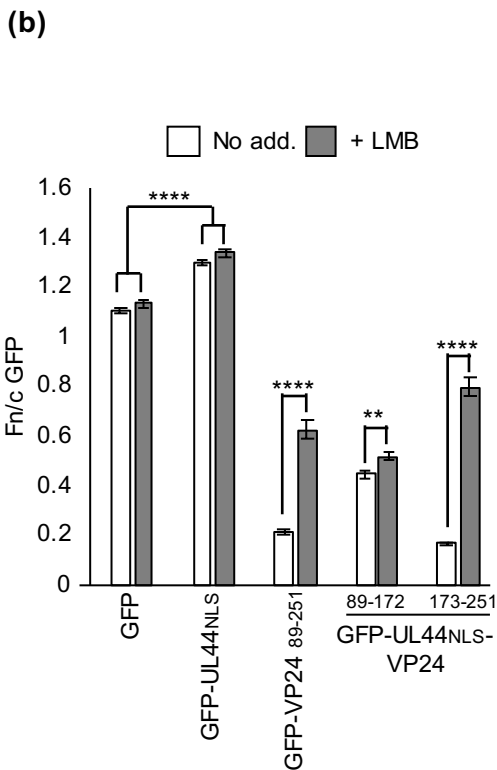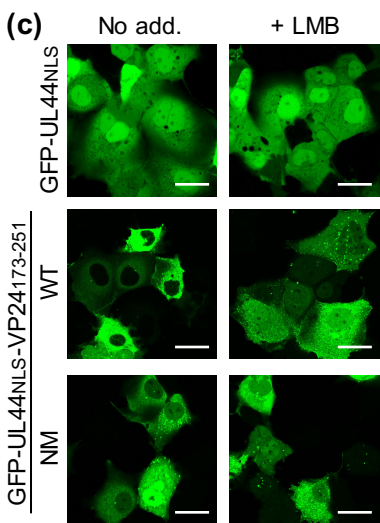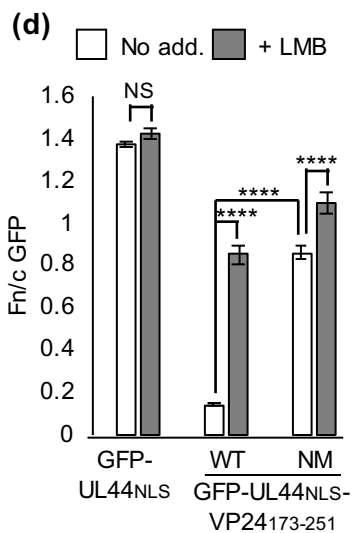

Supplement: s1 [file s1]
